RESEARCH ARTICLE

# Comparative Analysis of Direct Hospital Care Costs between Aseptic and Two-Stage Septic Knee Revision

Richard Kasch<sup>1\*</sup>, Sebastian Merk<sup>1</sup>, Grit Assmann<sup>1</sup>, Andreas Lahm<sup>1,2</sup>, Matthias Napp<sup>3</sup>, Harry Merk<sup>1</sup>, Steffen Flessa<sup>4</sup>

**1** Center for Orthopedics, Trauma Surgery and Rehabilitation Medicine, Clinic and Outpatient Clinic for Orthopedics and Orthopedic Surgery, University Medicine Greifswald, Greifswald, Germany, **2** Kliniken Maria Hilf Mönchengladbach, Academic Teaching Hospital of the RWTH Aachen, Mönchengladbach, Germany, **3** Center for Orthopedics, Trauma Surgery and Rehabilitation Medicine, Department of Trauma Surgery, University Medicine Greifswald, Greifswald, Germany, **4** Department of Health Care Management, Faculty of Law and Economics, Ernst-Moritz-Arndt-University, Greifswald, Germany

\* [richard.kasch@uni-greifswald.de](mailto:richard.kasch@uni-greifswald.de)

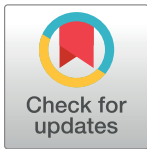

**OPEN ACCESS**

**Citation:** Kasch R, Merk S, Assmann G, Lahm A, Napp M, Merk H, et al. (2017) Comparative Analysis of Direct Hospital Care Costs between Aseptic and Two-Stage Septic Knee Revision. PLoS ONE 12(1): e0169558. doi:10.1371/journal.pone.0169558

**Editor:** Daniel Steffens, Royal Prince Alfred Hospital, AUSTRALIA

**Received:** June 12, 2016

**Accepted:** December 18, 2016

**Published:** January 20, 2017

**Copyright:** © 2017 Kasch et al. This is an open access article distributed under the terms of the [Creative Commons Attribution License](https://creativecommons.org/licenses/by/4.0/), which permits unrestricted use, distribution, and reproduction in any medium, provided the original author and source are credited.

**Data Availability Statement:** Individual data related to patients is restricted due to legal and ethical reasons. For interested researchers that would like access data that is not contained within the paper, please send requests to the lead author at [kaschr@uni-greifswald.de](mailto:kaschr@uni-greifswald.de).

**Funding:** None of the authors received any funding for this study.

**Competing Interests:** The authors have declared that no competing interests exist.

## Abstract

### Background

The most common intermediate and long-term complications of total knee arthroplasty (TKA) include aseptic and septic failure of prosthetic joints. These complications cause suffering, and their management is expensive. In the future the number of revision TKA will increase, which involves a greater financial burden. Little concrete data about direct costs for aseptic and two-stage septic knee revisions with an in depth-analysis of septic explantation and implantation is available.

### Questions/Purposes

A retrospective consecutive analysis of the major partial costs involved in revision TKA for aseptic and septic failure was undertaken to compare 1) demographic and clinical characteristics, and 2) variable direct costs (from a hospital department's perspective) between patients who underwent single-stage aseptic and two-stage septic revision of TKA in a hospital providing maximum care. We separately analyze the explantation and implantation procedures in septic revision cases and identify the major cost drivers of knee revision operations.

### Methods

A total of 106 consecutive patients (71 aseptic and 35 septic) was included. All direct costs of diagnosis, surgery, and treatment from the hospital department's perspective were calculated as real purchase prices. Personnel involvement was calculated in units of minutes.

### Results

Aseptic versus septic revisions differed significantly in terms of length of hospital stay (15.2 vs. 39.9 days), number of reported secondary diagnoses (6.3 vs. 9.8) and incision-suture

time (108.3 min vs. 193.2 min). The management of septic revision TKA was significantly more expensive than that of aseptic failure (\$12,223.79 vs. \$6,749.43) ( $p < .001$ ).

On the level of the separate hospitalizations the mean direct costs of explantation stage (\$4,540.46) were lower than aseptic revision TKA (\$6,749.43) which were again lower than those of the septic implantation stage (\$7,683.33). All mean costs of stays were not comparable as they differ significantly ( $p < .001$ ). Major cost drivers were the cost of the implant and general staff. The septic implantation part was on average \$3,142.87 more expensive than septic explantations ( $p < .001$ ).

## Conclusions

Our study for the first time provides a detailed analysis of the major direct case costs of aseptic and septic revision TKA from the hospital-department's perspective which is the basis for long-term orientated decision making. In the future, our cost analysis has to be interpreted in relation to reimbursement estimates. This is important to check whether revision TKA lead to a financial loss for the operating department.

## Introduction

### Background

While the number of primary total knee arthroplasties (TKA) has already reached a high level in some western industrialized countries, global data suggest that other countries are quickly catching up [1–6]. Due to this trend and an ageing society it is expected that especially the rate of revision TKA surgery will increase disproportionately in the next decade [7–9]. Revision TKA and its possible complications require more resources than primary TKA in terms of diagnostic procedures, length of hospital stay and postoperative care [10–13]. This applies even more to septic revision procedures than aseptic prosthesis failure [14–16]. The high number of resource-intensive interventions that are expected to be required in the future, along with increasing economic pressure on hospitals and health systems in general, place revision TKA surgery in the focus of economic discussions.

Aseptic failure is one of the main reasons why patients may require long-term revision after TKA and is managed by arthroplasty of the loose joint parts [17,18]. A more devastating complication is chronic infection of knee arthroplasties, which is associated with higher mortality, morbidity and health care use [9]. From a clinical perspective, two-stage revision is considered the benchmark procedure, as it requires extraordinary medical expertise and care and should be performed by experienced maximum care providers [17,19–23]. Even from the hospital department's perspective, septic revision TKAs are not only clinically challenging but also economically outstanding as they are non-elective, time-consuming surgeries, requiring expensive prostheses and medications, longer hospital stays including ICU, and involve more complications [15].

Patient management has more and more been affected by financial restrictions [15,24–27]. Most hospitals provide primary care, performing a wide range of different basic procedures. In addition, maximum care providers such as university hospitals are responsible to offer specialized treatment for rare diseases and life-threatening conditions. Optimally, the total revenues of a hospital from a mixture of basic and specialized medical services should exceed its costs [28].

For a hospital to make sound economic decisions, it is necessary to analyze variable and case-fixed costs. Reimbursement is not a sound basis for decision making, as the reimbursement systems differ between countries and cannot be of influence by the hospital. For orthopedic departments it is essential to know where and what costs occur in the treatment of an individual patient to have a chance to restructure workflow or use synergies.

Healthcare providers tend to regard different types of joint replacement procedures together without adequately considering differences between primary and revision THAs and TKAs although these differences have implications for patient management and resource allocation. To the best of our knowledge, all published cost studies of revision TKA, unlike those of aseptic and septic total hip revision, use a total cost approach [29–31], which provides no basis for economic decisions for the department performing this kind of surgery [15,26,32–36]. In contrast, the partial cost approach we present here and have already used for a similar study of hip replacement distinguishes variable from case-fixed costs [30]. It thus contributes essential data for making future management decisions in hospital departments. Furthermore, to the best of our knowledge, a comprehensive cost assessment of two-stage septic knee revisions with an in depth-analysis of septic explantation and implantation has not been done before. In addition, our review of the literature has not revealed any publication comparing costs of aseptic and septic revision TKA using this approach.

## Questions/Purposes

The purpose of our analysis was to evaluate the hypothesis that explantation and implantation procedures of a septic two-stage knee revision are more expensive than the aseptic (one-stage) procedure using an approach that analyzes those costs that are important for hospital decision-makers. To avoid the shortcomings of earlier publications addressing this question, we compare variable and case-fixed costs in a series of consecutive patients who underwent single-stage aseptic and two-stage septic revision of TKA from a hospital department's perspective. We separately identify the major cost drivers of knee revisions.

## Materials and Methods

### Study design and patient selection

The local ethics committee of Ernst-Moritz-Arndt University Greifswald (Felix-Hausdorff-Str. 3, 17487 Greifswald) approved the study (BB 010/13) and waived written informed consent, without restrictions on data. In the methods section we followed previously published protocols, describing in detail design, patient selection, outcome measures and the calculation of costs [24,30]. All patients (n = 106) undergoing revision TKA were treated in a university hospital providing primary medical care and specialized procedures in the period of 39 months ending Jan. 1, 2012. Since our aim was to analyze all aseptic as well as septic revision TKA's performed, no case exclusion was done in this consecutive study. Following international guidelines, and cost studies of the hip published before [30], patients were included when (1) they had an ICD-10 (International Classification of Diseases) indication for TKA revision according to Code T84.0 (aseptic—mechanical complication of internal joint prosthesis) or T84.5 (septic—infection and inflammatory reaction due to internal joint prosthesis) and (2) underwent procedures with OPS (Operation and Procedure) Codes 5–823 (Re-operation, exchange or removal of an artificial knee joint) and 5–822 (Implantation of an artificial knee joint) [37,38]. The inclusion of patients with aseptic/septic failure was based on the presence of: (1) typical clinical signs and symptoms in the leg; (2) imaging confirmation of loosening including x-rays and scintigraphy; and (3) characteristic laboratory and pathophysiologic values in blood [39,40]. All patients with septic TKA were tested for infection via joint biopsy. A

positive microbiological culture was the indication for the periprosthetic infection, knowing that there are also septic joints which are culture negative. Since our main question of interest focused on the average TKA replacement we consecutively included all aseptic cases independently of the revision extent. Nevertheless we tested whether mean costs of total revision cases differ from those of partial aseptic revisions to make sure that we provide a valid comparison.

As described in detail previously, “All data were systematically generated using the unique case number to search the hospital’s health information system such as SAP. When the electronic patient file was incomplete or inconsistent with regard to eligibility, or patient outcome, we additionally retrieved the paper files from the hospital’s archive to obtain more data [24,30]”.

The local ethics committee of Ernst-Moritz-Arndt University Greifswald approved the study (BB 010/13) and waived written informed consent.

## Demographic and clinical outcome measures

Following Assmann et al. and Kasch et al. patient demographics (age, gender), clinical measures (pathogens, length of stay, operative time, number of comorbidities, extent of revision), consumption of hospital resources, and economic data were retrospectively evaluated case-by-case [24,30]. Following international guidelines septic TKA revisions are performed as two-stage procedures with two hospital stays, which we analyzed separately (septic explantation versus septic implantation) [17,18]. While adding both TKA operations together when comparing septic versus aseptic knee revision, we also utilized the separate data, amongst others, for the comparison of septic implantation (e.g., stage two alone) with aseptic revision.

## Determination of costs

The study took place in Germany, and therefore all economic data were obtained in Euro (€). Subsequently, all quotations were converted to United States Dollars (US\$), with US-\$1 equivalent to €0.9006, with regard to the mean international exchange rate in 2015.

As described in detail previously the analysis included variable and case fixed costs, following Kasch et al. [24,29,31,41]. “Those costs could be directly related to an individual case and can be influenced directly. We did not include fixed hospital costs that arise irrespective of the treatment of individual patients (energy, heating, license fees for software, room costs, staff costs for security, gardening, cleaning). Fixed costs are excluded because they are not influenced by the treatment of patients and hence are not relevant for managerial decision-making” [30].

Costs were analyzed using the outcome measures presented in Table 1. These were included in terms of frequency while patient’s stay in the hospital to then assign the costs they generated. To ensure we analyze realistic cost structures we utilized the hospital’s actual purchase prices rather than official list prices. Especially noteworthy is the calculation of drug costs. According to the recorded admission medication we analyzed every single day of hospital stay by evaluating all information of the patient file. In cooperation with the university hospital pharmacy we searched appropriate price data for more than 400 different drugs.

As we expected ICU to be an important cost factor we included this cost data as well. Therefore, we got minute exactly duration information about the patient’s stay on the ICU. According to the central controlling business unit of the analyzed hospital the average costs of 24 hours on the ICU were \$1,296.86.

## Statistical methods

Statistical methods are in line with our former published analyses of the hip: “All data are given as means with standard deviations. As cost data are often not normally distributed, but

**Table 1. Performance and cost areas for the analyzed cases. Following Kasch et al. [24].**

| Location of cost generation | Cause of costs                       | Unit                          | Cost per unit [\$]                                                    | Costs [\$]                             |
|-----------------------------|--------------------------------------|-------------------------------|-----------------------------------------------------------------------|----------------------------------------|
| <b>Normal ward</b>          |                                      |                               |                                                                       |                                        |
| Nursing staff               | Nursing staff time                   | [ppr min]                     | Costs per min                                                         | Time required * costs per unit of time |
| Laboratory                  | Laboratory diagnostics               | [Points]                      | ∅ Point value                                                         | Points * Point value                   |
| Radiology                   | Radiological diagnostics             | [Points]                      | ∅ Point value                                                         | Points * Point value                   |
| Physiotherapy               | Physiotherapy                        | [Points]                      | ∅ Point value                                                         | Points * Point value                   |
| Medication                  | Medication during whole stay         | [\$]                          | [\$]                                                                  | Direct costs                           |
| Intensive care              | ICU treatment                        | [min]                         | Costs per min                                                         | Time required * costs per unit of time |
| <b>Surgical costs</b>       |                                      |                               |                                                                       |                                        |
| Orthopedics (doctor)        | Orthopedic surgeon time              | [min]                         | Costs per min                                                         | Time required * costs per unit of time |
| Orthopedics (nursing)       | Surgical nursing staff time          | [min]                         | Costs per min                                                         | Time required * costs per unit of time |
| Anesthesiology (doctor)     | Anesthesiologist time                | [min]                         | Costs per min                                                         | Time required * costs per unit of time |
| Anesthesiology (nursing)    | Anesthesiological nursing staff time | [min]                         | Costs per min                                                         | Time required * costs per unit of time |
| Implant                     | Implant                              | [\$]                          | [\$]                                                                  | Direct costs                           |
| Expendable material         | Materials used                       | [\$]                          | [\$]                                                                  | Direct costs                           |
| Sterilization               | [sterilization sieve]                | Costs per sterilization sieve | Number of sterilization sieves * costs per sterilization of one sieve |                                        |
| Blood products              | Blood transfusions                   | [\$]                          | [\$]                                                                  | Direct costs                           |

\* = multiplication sign

doi:10.1371/journal.pone.0169558.t001

skewed we tested this (Kolmogorow-Smirnow-test) and used for the skewed data non-parametric tests as the Mann-Whitney U-test. For normally distributed data Chi<sup>2</sup>-test and t-test, assuming statistical significance at p < .05. Statistical analysis of all parameters was undertaken using SPSS v.19<sup>®</sup> [30].

## Results

### Demographic and clinical results

One hundred and six patients undergoing revision of TKA due to septic (35 cases) or aseptic (71 cases) reasons were included in this analysis. Patient demographics are shown in Table 2. While aseptic cases require one hospital stay (median: 15.0 days), all septic cases are associated with at least two separate operations (mean: 2.0, min: 2, max: 5) on two separate hospital stays (explantation of the infected endoprosthesis (median: 18.0 days) and implantation of the new joint (median: 15.0 days)).

We found sex distribution to be the same with no statistical difference (see Table 2). To the disadvantage of septic cases the mean patient age at the time of revision surgery, number of documented comorbidities, the mean hospital stay and the mean number of operations differed significantly to aseptic patients. Histological examinations were performed in all septic cases. The range of pathogenic agents isolated in patients undergoing septic revision is even shown in Table 2.

Total revision of all components was done in 64 of the 71 (90.1%) aseptic cases, while this was done in all septic cases (n = 35, 100%). The mean overall costs did not differ in both aseptic groups (p = .600). Therefore, we compared all aseptic cases (n = 71) with the septic treatments of total revision using two revision approach subsequently.

**Table 2. Baseline demographic and clinical characteristics of patients who underwent TKA categorized by indication.** Continuous data are mean (SD), categorical data are counts (%).

|                                    | Aseptic    | Septic <sup>1</sup> | p-value | All cases   |
|------------------------------------|------------|---------------------|---------|-------------|
| Total                              | 71 (67.0%) | 35 (33.0%)          | -       | 106 (100%)  |
| Complete <sup>2</sup>              | 64 (90.1%) | 35 (100.0%)         | -       | 99 (93.4%)  |
| Partial <sup>3</sup>               | 7 (9.9%)   | 0 (0.0%)            | -       | 7 (6.6%)    |
| Age [years]                        | 65.6 (9.4) | 69.3 (9.3)          | .034    | 66.8 (9.5)  |
| Gender                             |            |                     | .137    |             |
| Male                               | 22 (31.0%) | 16 (45.7%)          | -       | 38 (35.8%)  |
| Female                             | 49 (69.0%) | 19 (54.3%)          | -       | 68 (64.2%)  |
| Number of diagnoses                | 6.3 (3.4)  | 9.8 (3.6)           | <.001   | 7.4 (3.9)   |
| Number of operations <sup>4</sup>  | 1.0 (0)    | 2.0 (1.0)           | <.001   | 1.5 (0.7)   |
| Length of stay [days] <sup>4</sup> | 15.0 (1.0) | 34.0 (11.0)         | <.001   | 23.3 (16.1) |
| Explantation                       | -          | 18.0 (9.0)          | -       | -           |
| Implantation                       | -          | 15.0 (6.0)          | -       | -           |
| Pathogenic agent <sup>5</sup>      |            |                     |         |             |
| <i>Staphylococci</i>               | -          | 35                  | -       | 35          |
| <i>Streptococci</i>                | -          | 4                   | -       | 4           |
| <i>Others</i> <sup>6</sup>         | -          | 3                   | -       | 3           |

<sup>1</sup> Two hospital stays;

<sup>2</sup> Revision of all components;

<sup>3</sup> The 7 aseptic partial revision surgery cases were done as femur only: 4 (5.6%) and tibia only: 3 (4.3%);

<sup>4</sup> As “Number of operations” and “Length of stay” are not normally distributed medians and interquartile ranges are presented

<sup>5</sup> 30 patients with one pathogenic agent, 4 patients with 2 pathogenic agents, 1 patient with 4 pathogenic agents,

<sup>6</sup> *Escheria coli*, *Enterobacter cloacae*, *Clostridium perfringens*

doi:10.1371/journal.pone.0169558.t002

### Health care resource utilization and cost

Table 3 lists the resources utilized and services provided during patient’s hospital stay(s) on normal ward. In all aseptic (septic) cases, a mean of 25.9 (41.5) physiotherapy units per patient were exercised and 1.9 (4.4) radiological imaging tests were performed. Furthermore, determination of 10 (35) laboratory parameters were required.

As shown in Table 4, over half of the costs in the normal ward are accounted for nursing care followed by physiotherapy. Mean nursing costs in the ward were greater for septic explantations at \$1,525.75 (SD: 640.62) than for septic implantations at \$1,021.02 (SD: 438.28), which was statistically significant. Mean medication costs per patient were significantly higher in the septic cases (p <.001), at \$98.42 (SD: 56.50) for daily medication and \$123.53 (SD: 87.04) for antibiotics mostly (76.1%) consumed during time of septic explantation (\$94.07, SD: 76.09).

**Table 3. Average diagnostic and treatment resource consumption separately for aseptic and septic hospital stay and categorized by explantation and implantation procedure.** Data are mean (SD).

|               | Aseptic (n = 71) | Septic (n = 35) <sup>1</sup> | p-value | Septic explantation (n = 35) | Septic implantation (n = 35) | p-value | All cases (n = 106) |
|---------------|------------------|------------------------------|---------|------------------------------|------------------------------|---------|---------------------|
| Radiology     | 1.9 (1.2)        | 4.4 (3.7)                    | <.001   | 2.6 (3.5)                    | 1.7 (1.1)                    | <.645   | 2.8 (2.6)           |
| Laboratory    | 10.0 (15.6)      | 35.3 (34.8)                  | <.001   | 22.4 (24.1)                  | 12.9 (13.6)                  | <.033   | 18.4 (26.4)         |
| Drugs         | 7.1 (3.3)        | 16.1 (4.6)                   | <.001   | 8.1 (3.1)                    | 8.00 (2.2)                   | <.864   | 15.5 (4.6)          |
| Physiotherapy | 25.9 (7.3)       | 41.5 (18.1)                  | <.001   | 18.4 (12.5)                  | 23.1 (12.2)                  | <.025   | 31.1 (14.0)         |

<sup>1</sup> Two hospital stays

doi:10.1371/journal.pone.0169558.t003



**Table 4. Average diagnostic and treatment costs separately for aseptic and septic hospital stay and categorized by explantation and implantation procedure.** Data are mean [\$] (SD).

|                     | Aseptic (n = 71) | Septic (n = 35) <sup>1</sup> | p-value | Septic explantation (n = 35) | Septic implantation (n = 35) | p-value | All cases (n = 106) |
|---------------------|------------------|------------------------------|---------|------------------------------|------------------------------|---------|---------------------|
| Nursing Normal Ward | 777.68 (243.10)  | 2,546.77 (885.66)            | <.001   | 1,525.75 (640.62)            | 1,021.02 (438.28)            | <.001   | 1,361.81 (986.54)   |
| Radiology           | 42.46 (42.01)    | 148.03 (261.02)              | <.001   | 108.56 (254.00)              | 39.47 (38.88)                | <.518   | 77.31 (160.40)      |
| Laboratory          | 36.77 (40.05)    | 212.03 (221.83)              | <.001   | 154.53 (208.63)              | 57.50 (47.74)                | <.001   | 94.64 (154.47)      |
| Drugs               | 43.31 (33.76)    | 221.95 (112.41)              | <.001   | 140.87 (93.09)               | 81.08 (53.90)                | <.001   | 102.29 (109.44)     |
| Physiotherapy       | 354.45 (95.67)   | 578.52 (236.08)              | <.001   | 262.10 (162.88)              | 316.42 (166.72)              | <.055   | 428.43 (188.04)     |

<sup>1</sup> Two hospital stays

doi:10.1371/journal.pone.0169558.t004

The mean incision-suture time was 108.3 min in aseptic revisions versus 193.2 min in two-stage septic revisions. In aseptic (septic) procedures, a mean of 12 (18) sterilization sieves and 1 (5) blood units were required (see Table 5). In the group of septic knee revision procedures, 26 patients (74.3%) were in the ICU for at least a couple of hours. In contrast, only 12 of the 71 patients with aseptic revision (16.9%) required ICU treatment.

The mean staff cost for surgery was \$828.15 (SD: 171.44) for aseptic procedures, which was \$944.70 significantly lower than the mean staff cost of septic intervention (\$1,772.85, SD: 552.25) (p <.001). The mean implant costs in septic procedures was \$4,208.28 (SD: 1,797.23), which was higher, but not statistically significant, than the mean implant cost of \$3,941.21 (SD: 1,069.84) in aseptic procedures (p <.137). All other surgery related costs differed significantly between aseptic and septic cases (see Table 6).

Fig 1 provides a bar diagram of costs. The mean direct cost for patients undergoing revision TKA was \$10,234.42 (SD: 4,519.65). The average cost difference between aseptic procedures (mean: \$8,072.51, SD: 1,847.15) and septic procedures (mean: \$14,620.00, SD: 5,147.85) was \$6,547.49 and statistically significant (p <.001).

The mean cost of septic explantations was \$5,430.52 (SD: 3,948.81) versus \$9,189.48 (SD: 2,714.97) for septic implantations, which is in addition 81.1% more than the cost of aseptic procedures. The mean cost of complete (revision of all components) aseptic revision TKA's (n = 64) were \$8,193.10 (SD: 1,728.21) and quite less expensive than septic implantation (difference: \$996.38) (p = .014).

OP accounts for the largest component of the complete cost of knee revision (\$5,847.70, SD: 1,473.68), followed by costs for diagnostic and treatment (\$2,064.50, SD: 1,420.22) and ICU costs (\$644.80, SD: 1,523.40). The largest share is accounted by the cost of the implant (47.1%), followed by normal ward staff cost (15.9%). Other major cost items are surgery staff and physiotherapy costs, accounting for 13.3% and 7.5%.

**Table 5. Average surgical consumption (including Intensive Care Unit) separately for aseptic and septic hospital stay and categorized by explantation and implantation procedure.** Data are mean (SD).

|                                  | Aseptic (n = 71) | Septic (n = 35) <sup>1</sup> | p-value | Septic explantation (n = 35) | Septic implantation (n = 35) | p-value | All cases (n = 106) |
|----------------------------------|------------------|------------------------------|---------|------------------------------|------------------------------|---------|---------------------|
| Incision-suture time [min]       | 108.3 (28.8)     | 193.2 (48.0)                 | <.001   | 81.9 (36.1)                  | 111.3 (28.9)                 | <.001   | 136.3 (53.9)        |
| Sterilization[No. of sieves]     | 12.1 (4.3)       | 17.8 (4.7)                   | <.001   | 7.4 (3.7)                    | 10.4 (4.9)                   | <.006   | 13.9 (5.2)          |
| Blood units                      | 1.4 (1.6)        | 5.2 (6.6)                    | <.001   | 2.8 (5.0)                    | 2.4 (2.3)                    | <.596   | 2.7 (4.3)           |
| ICU <sup>2</sup> duration [days] | 0.2 (0.4)        | 1.5 (1.8)                    | <.001   | 0.9 (1.4)                    | 0.5 (0.7)                    | <.328   | 0.6 (1.2)           |

<sup>1</sup> Two hospital stays,

<sup>2</sup> Intensive Care Unit

doi:10.1371/journal.pone.0169558.t005

**Table 6. Average surgical costs (including Intensive Care Unit) separately for aseptic and septic hospital stay and categorized by explantation and implantation procedure.** Data are mean [\$] (SD).

|                          | Aseptic (n = 71)    | Septic (n = 35) <sup>1</sup> | p-value | Septic explantation (n = 35) | Septic implantation (n = 35) | p-value | All cases (n = 106) |
|--------------------------|---------------------|------------------------------|---------|------------------------------|------------------------------|---------|---------------------|
| <b>Staff Costs</b>       |                     |                              |         |                              |                              |         |                     |
| Orthopedics (doctor)     | 394.70 (81.15)      | 821.59 (209.79)              | <.001   | 387.68 (186.89)              | 433.91 (89.62)               | <.001   | 535.66 (243.58)     |
| Orthopedics (nursing)    | 160.95 (32.24)      | 334.72 (90.22)               | <.001   | 161.00 (78.48)               | 173.72 (42.68)               | <.007   | 218.33 (100.35)     |
| Anesthesiology (doctor)  | 160.98 (35.79)      | 365.71 (160.45)              | <.001   | 185.40 (145.31)              | 180.31 (49.18)               | <.030   | 228.58 (136.19)     |
| Anesthesiology (nursing) | 111.52 (22.25)      | 250.81 (91.79)               | <.001   | 128.02 (84.95)               | 122.80 (27.88)               | <.060   | 157.51 (85.97)      |
| <b>Material Costs</b>    |                     |                              |         |                              |                              |         |                     |
| Implant                  | 3,944.21 (1,069.84) | 4,208.28 (1,797.23)          | <.137   | 16.19 (82.05)                | 4,192.09 (1,807.35)          | <.001   | 4,031.40 (1,351.00) |
| Expendable Material      | 57.57 (32.52)       | 136.95 (60.25)               | <.001   | 73.74 (39.17)                | 63.22 (38.77)                | <.254   | 83.78 (57.34)       |
| Sterilization            | 270.83 (106.10)     | 406.70 (117.35)              | <.001   | 161.06 (88.23)               | 245.65 (123.83)              | <.002   | 315.69 (126.84)     |
| Blood units              | 145.11 (163.91)     | 543.79 (663.29)              | <.001   | 280.19 (492.22)              | 263.61 (275.52)              | <.571   | 276.76 (442.56)     |
| <b>ICU<sup>2</sup></b>   | 178.77 (656.98)     | 1,039.86 (1,515.51)          | <.001   | 686.14 (1,200.67)            | 353.73 (516.90)              | <.277   | 463.09 (1,094.08)   |

<sup>1</sup> Two hospital stays,

<sup>2</sup> Intensive Care Unit

doi:10.1371/journal.pone.0169558.t006

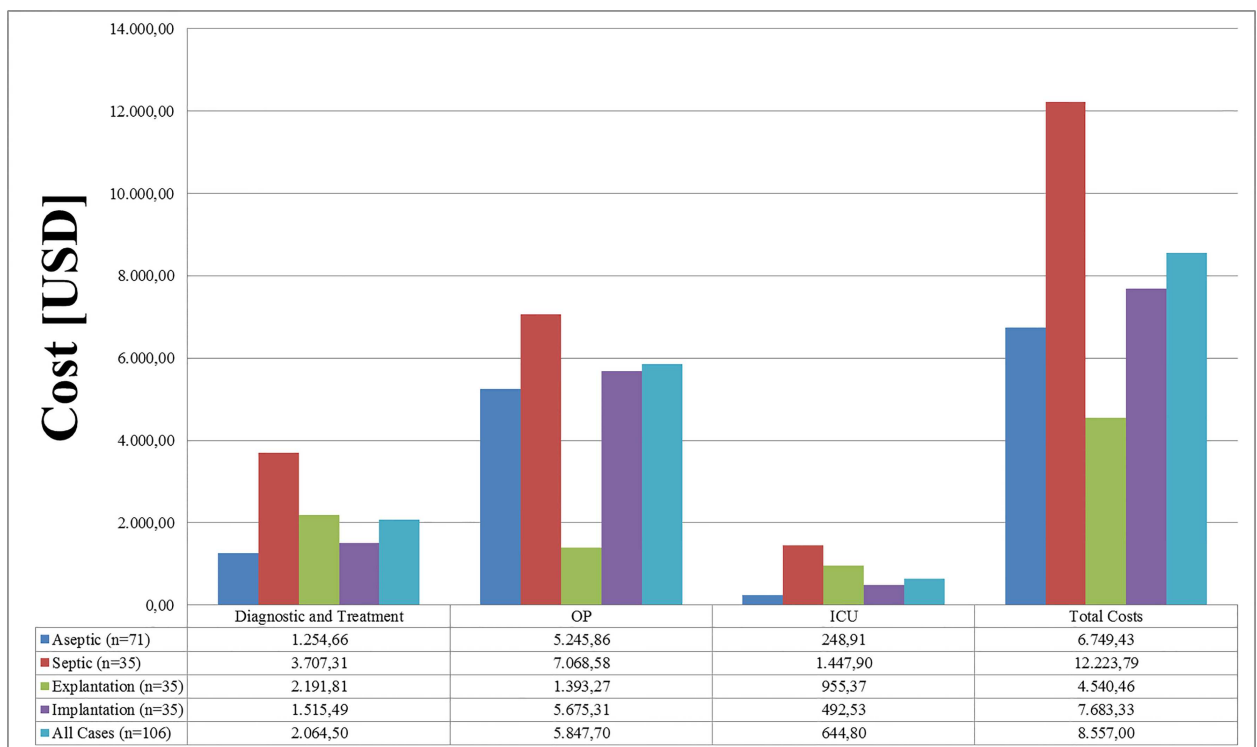

**Fig 1. Bar diagram of total costs for aseptic procedures (n = 71), septic procedures (n = 35), septic explantations (n = 35), septic implantations (n = 35), and total procedures (n = 106) [\$].** Septic (n = 35) = septic explantations (n = 35) + septic implantations (n = 35). Diagnostic and Treatment: Nursing Normal Ward + Radiology + Laboratory + Drugs + Physiotherapy. OP: Personal Costs + Implant + Expendable Material + Sterilization + Blood units. Total Costs: Diagnostic and Treatment + OP + ICU. ICU = Intensive Care Unit.

doi:10.1371/journal.pone.0169558.g001



## Discussion

### Background and rationale

Over a very short period of time, TKA has evolved into a widely accepted treatment mostly for patients with arthrosis of the knee [10,34,42]. Factors that have contributed to this development include an aging population with more diseases involving the musculoskeletal system such as the knee as well as the improved clinical outcome of knee replacement after advancement of both the surgical procedure and implants over the last decades [7,9,11,35]. As already shown for other joint replacement operations, such as the hip, revision operations after knee arthroplasty are more demanding than primary TKA, resulting in longer mean operation time, more blood transfusions, longer ICU stays due to higher complication rates, and a longer mean hospital stay [5,43]. The implants used in revision operations are also more complex and expensive. Therefore, it is obvious that the cost of (two-stage) revision TKA exceeds that of primary TKA [14,44]. Available studies have investigated hospital expenses and revenues for revision TKAs by using cost-effective analysis or a total cost approach [5,10,15,22,25–27,32,34–36,42,45].

Our study is the first to analyze the cost of aseptic and septic revision TKA using a partial cost approach. This approach allows us to identify the main cost drivers, which are relevant for future-orientated decision making. On the other hand, our approach ignores reimbursement, which cannot be influenced by an individual hospital, and also excludes fixed costs because they cannot be changed by a hospital department on a short-term basis.

### Study limitations

Our study has some limitations (see [30]): as our study was conducted at a single university hospital, our study population might not be representative for other hospitals or centers performing aseptic and septic knee revision surgery. Even prices for materials (e.g. implants) and salary structures differ a lot between countries and health care systems. Nevertheless, we think that relative differences in costs for aseptic and septic revision TKAs are similar across institutions. Our evaluation was limited by a small number of patients undergoing septic revision. Nevertheless, the total sample size was large enough for statistical analysis. We only analyzed direct costs arising in the hospital performing the operations. For a comprehensive assessment, future studies should additionally analyze the cost of outpatient aftercare and rehab related to revision TKA.

### Interpretation of results

The direct comparison of aseptic revision TKA ( $n = 71$ , \$6,749.43) with septic revisions ( $n = 35$ , \$12,223.79) confirms our hypothesis that the septic procedure is more costly than the aseptic one ( $p < .001$ ). This is mainly justified by two separate hospital stays and operations during septic revisions. Nevertheless even factors like the number of comorbidities may have an influence on the overall costs. Comparisons with previously published data should be regarded with caution as analytical approaches and health care systems differ. Differences also exist with regard to operative techniques, the implants used, and additional measures (e.g., intravenous vs. oral antibiotic treatment), all of which may affect costs directly or indirectly (shortening of hospital stay). Oduwole et al. reported costs of \$13,665.70 for aseptic and \$20,815.57 for septic TKA revisions performed between 2002 and 2006 [5]. To make costs comparable we converted cost data presented here using the mean international exchange rate of 2015. In comparison to our results the total difference appears very high, especially as nursing and theater costs were not included, thus costs seem to be underestimated. We assume that

our use of negotiated prices including rebates rather than list prices might be a reason for this. Nevertheless, our presented outcome is in line with previous results which reported significantly lower costs for revisions of aseptic total hip arthroplasty (THA) compared with septic revision of THA (\$4,588.02 vs. \$12,022.95 vs.) ( $p < .001$ ) [30]. To make costs comparable we converted cost data presented here (on the basis of exchange rates in 2013) using the mean international exchange rate of 2015. While costs for septic revisions are nearly the same (-\$200.84) there is a remarkable difference (+\$2,161.41) for aseptic revision TKAs. This might be due to differences in the proportion of complete revisions: In contrast to the published data about revision THA's (17%) our aseptic TKA cases included more than 90% of complete revisions. Another reason might be that implant costs of TKA were higher independently from complete or partial revision.

The higher cost of septic TKA revisions is mainly attributable to higher staff involvement and implant costs. All in all, septic TKA failure is not only a more complex life-threatening intervention but also incurs a markedly higher use of blood units, antibiotics and physical therapy with associated higher cost.

As expected, our separate analysis of the costs of both hospital stays of septic knee revision procedures confirms earlier studies reporting significantly lower mean cost of septic explantations (\$4,540.46) versus septic implantations (\$7,683.33) ( $p < .001$ ) [30].

The cost difference between the aseptic cases and septic implantation is rather low (\$933.90) but statistically significant ( $p = 0.008$ ). This is quite interesting because our earlier cost analysis study found a much higher difference for revision THA (difference: \$2,829.86) [30]. Even the comparison of the completely aseptic cases ( $n = 64$ , \$6,850.25) and septic implantation ( $n = 35$ , \$7,683.33), as a kind of sensitivity analysis, confirms our result ( $p = 0.014$ ). Cost differences might be attributable to a longer hospital stay (15.2 vs 18.4 days), higher implant costs (\$3,944.21 vs. \$4,192.09) and a greater resource utilization, e.g. for blood units (\$145.11 vs. 263.61) or drugs (\$43.31 vs. \$81.08). This clearly indicates that septic revisions are significantly more expensive, reflecting the fact that they are clinically more challenging and also a higher burden for patients.

## Conclusions

Our study for the first time provides a detailed analysis of the major direct case costs of aseptic and septic revision TKAs arising for the hospital department performing this kind of surgery. Our analysis provides hospitals with a sound basis for long-term economic planning. We found the costs to be nearly twice as high for septic versus aseptic revisions. In the two-step septic revision procedure, costs of septic explantation differ significantly from those of the implantation procedure. Implant costs and general staff costs were identified to account for the largest proportion of overall costs. Comparisons with data on THA replacement show that there are relevant differences in cost structure, thus decision-making should not be based on generalized assumptions based on one type of procedure.

## Acknowledgments

None of the authors have any financial or other relationships that might lead to a conflict of interest. Work was performed in the Center for Orthopedics, Trauma Surgery, and Rehabilitation, Clinic and Outpatient Clinic for Orthopedics and Orthopedic Surgery, University Medicine Greifswald in cooperation with the Department of Health Care Management, Faculty of Law and Economics, Ernst-Moritz-Arndt-University, Greifswald.

## Author Contributions

**Conceptualization:** RK SM GA HM SF.

**Data curation:** RK SM GA.

**Formal analysis:** RK SM GA HM SF.

**Funding acquisition:** RK HM SF.

**Investigation:** RK GA SM AL MN HM SF.

**Methodology:** RK SM GA AL MN HM SF.

**Project administration:** RK GA HM SF.

**Resources:** RK GA.

**Supervision:** RK HM SF.

**Validation:** RK SM GA AL MN HM SF.

**Visualization:** RK GA AL MN HM.

**Writing – original draft:** RK SM GA AL.

**Writing – review & editing:** RK SM GA AL MN HM SF.

## References

1. Kurtz S, Ong K, Lau E, Mowat F, Halpern M (2007) Projections of primary and revision hip and knee arthroplasty in the United States from 2005 to 2030. *J Bone Joint Surg Am* 89: 780–785. doi: [10.2106/JBJS.F.00222](https://doi.org/10.2106/JBJS.F.00222) PMID: [17403800](https://pubmed.ncbi.nlm.nih.gov/17403800/)
2. Kurtz SM, Lau E, Ong K, Zhao K, Kelly M, Bozic KJ (2009) Future young patient demand for primary and revision joint replacement: national projections from 2010 to 2030. *Clin Orthop Relat Res* 467: 2606–2612. doi: [10.1007/s11999-009-0834-6](https://doi.org/10.1007/s11999-009-0834-6) PMID: [19360453](https://pubmed.ncbi.nlm.nih.gov/19360453/)
3. Bozic KJ, Kurtz SM, Lau E, Ong K, Chiu V, Vail TP, et al. (2010) The epidemiology of revision total knee arthroplasty in the United States. *Clin Orthop Relat Res* 468: 45–51. doi: [10.1007/s11999-009-0945-0](https://doi.org/10.1007/s11999-009-0945-0) PMID: [19554385](https://pubmed.ncbi.nlm.nih.gov/19554385/)
4. Moyad TF, Thornhill T, Estok D (2008) Evaluation and management of the infected total hip and knee. *Orthopedics* 31: 581–588; quiz 589–590. PMID: [18661881](https://pubmed.ncbi.nlm.nih.gov/18661881/)
5. Oduwole KO, Molony DC, Walls RJ, Bashir SP, Mulhall KJ (2010) Increasing financial burden of revision total knee arthroplasty. *Knee Surg Sports Traumatol Arthrosc* 18: 945–948. doi: [10.1007/s00167-010-1074-8](https://doi.org/10.1007/s00167-010-1074-8) PMID: [20148322](https://pubmed.ncbi.nlm.nih.gov/20148322/)
6. Patel A, Pavlou G, Mujica-Mota RE, Toms AD (2015) The epidemiology of revision total knee and hip arthroplasty in England and Wales: a comparative analysis with projections for the United States. A study using the National Joint Registry dataset. *Bone Joint J* 97-B: 1076–1081. doi: [10.1302/0301-620X.97B8.35170](https://doi.org/10.1302/0301-620X.97B8.35170) PMID: [26224824](https://pubmed.ncbi.nlm.nih.gov/26224824/)
7. Australian Orthopaedic Institution, National Joint Replacement Registry (2015) Revision Hip and Knee Arthroplasty—Supplementary Report 2015.
8. Bozic KJ, Kamath AF, Ong K, Lau E, Kurtz S, Chan V, et al. (2015) Comparative Epidemiology of Revision Arthroplasty: Failed THA Poses Greater Clinical and Economic Burdens Than Failed TKA. *Clin Orthop Relat Res* 473: 2131–2138. doi: [10.1007/s11999-014-4078-8](https://doi.org/10.1007/s11999-014-4078-8) PMID: [25467789](https://pubmed.ncbi.nlm.nih.gov/25467789/)
9. Sundberg M, Lidgren L, W-Dahl A, Robertsson O (2015) Swedish Knee Arthroplasty Registry—Annual Report 2015. Helsingborg: Lund University, Department of Clinical Sciences, Orthopedics & Skånes University Hospital, Lund Sweden.
10. Ethgen O, Bruyere O, Richy F, Dardennes C, Reginster JY (2004) Health-related quality of life in total hip and total knee arthroplasty. A qualitative and systematic review of the literature. *J Bone Joint Surg Am* 86-A: 963–974. PMID: [15118039](https://pubmed.ncbi.nlm.nih.gov/15118039/)
11. Ong KL, Mowat FS, Chan N, Lau E, Halpern MT, Kurtz SM (2006) Economic burden of revision hip and knee arthroplasty in Medicare enrollees. *Clin Orthop Relat Res* 446: 22–28. doi: [10.1097/01.blo.0000214439.95268.59](https://doi.org/10.1097/01.blo.0000214439.95268.59) PMID: [16672867](https://pubmed.ncbi.nlm.nih.gov/16672867/)

12. Quintana JM, Escobar A, Arostegui I, Bilbao A, Azkarate J, Goenaga JI, et al. (2006) Health-related quality of life and appropriateness of knee or hip joint replacement. *Arch Intern Med* 166: 220–226. doi: [10.1001/archinte.166.2.220](https://doi.org/10.1001/archinte.166.2.220) PMID: [16432092](https://pubmed.ncbi.nlm.nih.gov/16432092/)
13. Kurtz S, Mowat F, Ong K, Chan N, Lau E, Halpern M (2005) Prevalence of primary and revision total hip and knee arthroplasty in the United States from 1990 through 2002. *J Bone Joint Surg Am* 87: 1487–1497. doi: [10.2106/JBJS.D.02441](https://doi.org/10.2106/JBJS.D.02441) PMID: [15995115](https://pubmed.ncbi.nlm.nih.gov/15995115/)
14. Ritter MA, Carr KD, Keating EM, Faris PN, Bankoff DL, Ireland PM (1996) Revision total joint arthroplasty: does medicare reimbursement justify time spent? *Orthopedics* 19: 137–139. PMID: [8834288](https://pubmed.ncbi.nlm.nih.gov/8834288/)
15. Lavernia CJ, Drakeford MK, Tsao AK, Gittelsohn A, Krackow KA, Hungerford DS (1995) Revision and primary hip and knee arthroplasty. A cost analysis. *Clin Orthop Relat Res*: 136–141.
16. Barrack RL (1996) Economics of the infected total knee replacement. *Orthopedics* 19: 780–782. PMID: [8887422](https://pubmed.ncbi.nlm.nih.gov/8887422/)
17. Vince KG (2014) The problem total knee replacement: systematic, comprehensive and efficient evaluation. *Bone Joint J* 96-B: 105–111. doi: [10.1302/0301-620X.96B11.34531](https://doi.org/10.1302/0301-620X.96B11.34531) PMID: [25381420](https://pubmed.ncbi.nlm.nih.gov/25381420/)
18. Frank RM, Cross MB, Della Valle CJ (2014) Periprosthetic Joint Infection: Modern Aspects of Prevention, Diagnosis, and Treatment. *J Knee Surg*.
19. Insall JN, Thompson FM, Brause BD (1983) Two-stage reimplantation for the salvage of infected total knee arthroplasty. *J Bone Joint Surg Am* 65: 1087–1098. PMID: [6630253](https://pubmed.ncbi.nlm.nih.gov/6630253/)
20. Lohmann CH, Furst M, Niggemeyer O, Ruther W (2007) [The treatment of periprosthetic infections]. *Z Rheumatol* 66: 28–33. doi: [10.1007/s00393-006-0141-5](https://doi.org/10.1007/s00393-006-0141-5) PMID: [17221249](https://pubmed.ncbi.nlm.nih.gov/17221249/)
21. Romano CL, Gala L, Logoluso N, Romano D, Drago L (2012) Two-stage revision of septic knee prosthesis with articulating knee spacers yields better infection eradication rate than one-stage or two-stage revision with static spacers. *Knee Surg Sports Traumatol Arthrosc* 20: 2445–2453. doi: [10.1007/s00167-012-1885-x](https://doi.org/10.1007/s00167-012-1885-x) PMID: [22270671](https://pubmed.ncbi.nlm.nih.gov/22270671/)
22. Hsu CS, Hsu CC, Wang JW, Lin PC (2008) Two-stage revision of infected total knee arthroplasty using an antibiotic-impregnated static cement-spacer. *Chang Gung Med J* 31: 583–591. PMID: [19241898](https://pubmed.ncbi.nlm.nih.gov/19241898/)
23. Silvestre A, Almeida F, Renovell P, Morante E, Lopez R (2013) Revision of infected total knee arthroplasty: two-stage reimplantation using an antibiotic-impregnated static spacer. *Clin Orthop Surg* 5: 180–187. doi: [10.4055/cios.2013.5.3.180](https://doi.org/10.4055/cios.2013.5.3.180) PMID: [24009903](https://pubmed.ncbi.nlm.nih.gov/24009903/)
24. Kasch R, Merk S, Drescher W, Schulz AP, Kayser R, Skripitz R, et al. (2012) Marginal contribution of UKS- versus TKA in varus arthritis of the knee. *Arch Orthop Trauma Surg* 132: 1165–1172. doi: [10.1007/s00402-012-1535-2](https://doi.org/10.1007/s00402-012-1535-2) PMID: [22643803](https://pubmed.ncbi.nlm.nih.gov/22643803/)
25. Kurtz SM, Lau E, Watson H, Schmier JK, Parvizi J (2012) Economic burden of periprosthetic joint infection in the United States. *J Arthroplasty* 27: 61–65e61. doi: [10.1016/j.arth.2012.02.022](https://doi.org/10.1016/j.arth.2012.02.022) PMID: [22554729](https://pubmed.ncbi.nlm.nih.gov/22554729/)
26. Losina E, Walensky RP, Kessler CL, Emrani PS, Reichmann WM, Wright EA, et al. (2009) Cost-effectiveness of total knee arthroplasty in the United States: patient risk and hospital volume. *Arch Intern Med* 169: 1113–1121; discussion 1121–1112. doi: [10.1001/archinternmed.2009.136](https://doi.org/10.1001/archinternmed.2009.136) PMID: [19546411](https://pubmed.ncbi.nlm.nih.gov/19546411/)
27. Haenle M, Skripitz C, Mittelmeier W, Skripitz R (2012) Economic impact of infected total knee arthroplasty. *ScientificWorldJournal* 2012: 196515. doi: [10.1100/2012/196515](https://doi.org/10.1100/2012/196515) PMID: [22619626](https://pubmed.ncbi.nlm.nih.gov/22619626/)
28. Crowe JF, Sculco TP, Kahn B (2003) Revision total hip arthroplasty: hospital cost and reimbursement analysis. *Clin Orthop Relat Res*: 175–182.
29. Kasch R, Assmann G, Merk S, Barz T, Melloh M, Hofer A, et al. (2016) Economic analysis of two-stage septic revision after total hip arthroplasty: What are the relevant costs for the hospital's orthopedic department? *BMC Musculoskelet Disord* 17: 112. doi: [10.1186/s12891-016-0962-6](https://doi.org/10.1186/s12891-016-0962-6) PMID: [26932453](https://pubmed.ncbi.nlm.nih.gov/26932453/)
30. Assmann G, Kasch R, Maher CG, Hofer A, Barz T, Merk H, et al. (2014) Comparison of health care costs between aseptic and two stage septic hip revision. *J Arthroplasty* 29: 1925–1931. doi: [10.1016/j.arth.2014.04.043](https://doi.org/10.1016/j.arth.2014.04.043) PMID: [24927869](https://pubmed.ncbi.nlm.nih.gov/24927869/)
31. Assmann G, Kasch R, Hofer A, Schulz AP, Kayser R, Lahm A, et al. (2014) An economic analysis of aseptic revision hip arthroplasty: calculation of partial hospital costs in relation to reimbursement. *Arch Orthop Trauma Surg* 134: 413–420. doi: [10.1007/s00402-014-1920-0](https://doi.org/10.1007/s00402-014-1920-0) PMID: [24477287](https://pubmed.ncbi.nlm.nih.gov/24477287/)
32. Krummenauer F, Wolf C, Gunther KP, Kirschner S (2009) Clinical Benefit and Cost Effectiveness of Total Knee Arthroplasty in the Older Patient. *Eur J Med Res* 14: 76–84. doi: [10.1186/2047-783X-14-2-76](https://doi.org/10.1186/2047-783X-14-2-76) PMID: [19258217](https://pubmed.ncbi.nlm.nih.gov/19258217/)
33. Koskinen E, Eskelinen A, Paavolainen P, Pulkkinen P, Remes V (2008) Comparison of survival and cost-effectiveness between unicondylar arthroplasty and total knee arthroplasty in patients with primary osteoarthritis: a follow-up study of 50,493 knee replacements from the Finnish Arthroplasty Register. *Acta Orthop* 79: 499–507. doi: [10.1080/17453670710015490](https://doi.org/10.1080/17453670710015490) PMID: [18766483](https://pubmed.ncbi.nlm.nih.gov/18766483/)

34. Higashi H, Barendregt JJ (2011) Cost-effectiveness of total hip and knee replacements for the Australian population with osteoarthritis: discrete-event simulation model. *PLoS One* 6: e25403. doi: [10.1371/journal.pone.0025403](https://doi.org/10.1371/journal.pone.0025403) PMID: [21966520](https://pubmed.ncbi.nlm.nih.gov/21966520/)
35. Healy WL, Iorio R (2007) Implant selection and cost for total joint arthroplasty: conflict between surgeons and hospitals. *Clin Orthop Relat Res* 457: 57–63. doi: [10.1097/BLO.0b013e31803372e0](https://doi.org/10.1097/BLO.0b013e31803372e0) PMID: [17242613](https://pubmed.ncbi.nlm.nih.gov/17242613/)
36. Bozic KJ, Stacey B, Berger A, Sadosky A, Oster G (2012) Resource utilization and costs before and after total joint arthroplasty. *BMC Health Serv Res* 12: 73. doi: [10.1186/1472-6963-12-73](https://doi.org/10.1186/1472-6963-12-73) PMID: [22443109](https://pubmed.ncbi.nlm.nih.gov/22443109/)
37. DIMDI—Deutsches Institut für Medizinische Dokumentation und Information (2016) OPS.
38. DIMDI—Deutsches Institut für Medizinische Dokumentation und Information (2016) ICD-10-GM.
39. Darouiche RO (2004) Treatment of infections associated with surgical implants. *N Engl J Med* 350: 1422–1429. doi: [10.1056/NEJMra035415](https://doi.org/10.1056/NEJMra035415) PMID: [15070792](https://pubmed.ncbi.nlm.nih.gov/15070792/)
40. Del Pozo JL, Patel R (2009) Clinical practice. Infection associated with prosthetic joints. *N Engl J Med* 361: 787–794. doi: [10.1056/NEJMcp0905029](https://doi.org/10.1056/NEJMcp0905029) PMID: [19692690](https://pubmed.ncbi.nlm.nih.gov/19692690/)
41. Kasch R, Merk S, Kayser R, Lahm A, Drescher W, Schulz AP, et al. (2011) Sledge versus bicondylar surface treatment in the endoprosthetic therapy for unicompartmental knee arthritis—a comparative cost analysis. *Z Orthop Unfall* 149: 646–652. doi: [10.1055/s-0031-1280248](https://doi.org/10.1055/s-0031-1280248) PMID: [22161737](https://pubmed.ncbi.nlm.nih.gov/22161737/)
42. Xie F, Lo NN, Tarride JE, O'Reilly D, Goeree R, Lee HP (2010) Total or partial knee replacement? Cost-utility analysis in patients with knee osteoarthritis based on a 2-year observational study. *Eur J Health Econ* 11: 27–34. doi: [10.1007/s10198-009-0154-5](https://doi.org/10.1007/s10198-009-0154-5) PMID: [19430952](https://pubmed.ncbi.nlm.nih.gov/19430952/)
43. Bozic KJ, Katz P, Cisternas M, Ono L, Ries MD, Showstack J (2005) Hospital resource utilization for primary and revision total hip arthroplasty. *J Bone Joint Surg Am* 87: 570–576. doi: [10.2106/JBJS.D.02121](https://doi.org/10.2106/JBJS.D.02121) PMID: [15741624](https://pubmed.ncbi.nlm.nih.gov/15741624/)
44. Healy WL, Iorio R, Richards JA, Lucchesi C (1998) Opportunities for control of hospital costs for total joint arthroplasty after initial cost containment. *J Arthroplasty* 13: 504–507. PMID: [9726314](https://pubmed.ncbi.nlm.nih.gov/9726314/)
45. Kurtz SM, Ong KL, Schmier J, Mowat F, Saleh K, Dybvik E, et al. (2007) Future clinical and economic impact of revision total hip and knee arthroplasty. *J Bone Joint Surg Am* 89 Suppl 3: 144–151.
